# Supplementary material for: Research on Association of the Diameter of the Internal Carotid Artery Siphon and Nonarteritic Anterior Ischaemic Optic Neuropathy
Source: J Ophthalmol. 2019 Sep 2;2019:7910602. doi: 10.1155/2019/7910602 (PMC6745138; doi:10.1155/2019/7910602)
Supplement: Supplementary Materials — ICAS D (affected) cm: the diameter of the internal carotid artery siphon in the observation group (centimeter); OA D (affected) cm: the diameter of the ophthalmic artery (NAION eye) (centimeter); ICAS D (health) cm: the diameter of the internal carotid artery siphon in the control group (centimeter); OA D (health) cm: the diameter of the ophthalmic artery (the fellow healthy eyes) (centimeter); group: 0 = observation group 1 = control group; plaque: carotid atherosclerosis plaque; plaque(modified): modified carotid atherosclerosis plaque number according to statistical requirements; stenosis: ipsilateral internal carotid artery stenosis; stenosis(modified): modified ipsilateral internal carotid artery stenosis according to statistical requirements; IMT (affected): intima-media thickness of the internal carotid artery in the observation group; IMT (health): intima-media thickness of the internal carotid artery in the control group; Vm (health): the average blood flow velocity of the internal carotid artery in the control group; Vm (affected): the average blood flow velocity of the internal carotid artery in the observation group; RI (affected): the resistance index of the internal carotid artery in the observation group; RI (health): the resistance index of the internal carotid artery in the control group; SPCAs (health) PSV: the peak systolic velocity of the short posterior ciliary arteries in the control group; SPCAs (health) EDV: the end diastolic velocity of the short posterior ciliary arteries in the control group; SPCAs (health) RI: the resistance index of the short posterior ciliary arteries in the control group; SPCAs (affected) PSV: the peak systolic velocity of the short posterior ciliary arteries in the observation group; SPCAs (affected) EDV: the end diastolic velocity of the short posterior ciliary arteries in the observation group; SPCAs (affected) RI: the resistance index of the short posterior ciliary arteries in the observation group. [file 7910602.f1.xls]

## Sheet: AION
ICAS D（affected）cm	OA D（affected）cm	ICAS D (health) cm	OA D （health）cm	group	plaque	plaque(modified)	stenosis	stenosis(modified)	IMT(affected)	IMT(health)	Vm (health)	Vm (affected)	RI (affected)	RI(health)	SPCAs (health)PSV	SPCAs (health) EDV	SPCAs (health) RI	SPCAs (affected) PSV	SPCAs (affected) EDV	SPCAs (affected) RI
0.28	0.14	0.37	0.12	0	1	1	1	1	0.78	0.74	28.1	25.2	0.74	0.71	11.1	4.6	0.59	9.1	3.3	0.64
0.26	0.13	0.24	0.12	0	0	0	1	1	0.78	0.77	29.4	29.1	0.75	0.73	16.1	6.3	0.61	15.4	4.2	0.73
0.38	0.15	0.38	0.12	0	0	0	0	0	0.74	0.75	25.8	26	0.7	0.67	8.1	2.6	0.68	8.7	3.8	0.56
0.22	0.13	0.31	0.18	0	2	1	2	1	0.8	0.78	30	27.9	0.78	0.73	14.5	5.7	0.61	13.7	4.9	0.6
0.26	0.15	0.28	0.17	0	1	1	1	1	0.76	0.76	29.5	27.2	0.77	0.7	12.6	2.5	0.67	11.2	4.3	0.64
0.1	0.18	0.28	0.14	0	3	1	3	1	0.81	0.79	38.2	26.4	0.9	0.77	15.5	5.3	0.6	5.5	1.6	0.82
0.35	0.13	0.32	0.14	0	0	0	0	0	0.72	0.73	24.9	25.1	0.7	0.67	12.1	5.9	0.51	17.3	4.4	0.74
0.31	0.17	0.27	0.12	0	0	0	0	0	0.72	0.72	28.3	28	0.71	0.71	14.3	5.3	0.63	10.1	4.3	0.64
0.3	0.18	0.28	0.16	0	1	1	0	0	0.73	0.74	28.5	28.4	0.71	0.72	19.1	7.5	0.61	16	5.1	0.61
0.32	0.18	0.32	0.18	0	0	0	0	0	0.7	0.71	28	27	0.7	0.65	8.8	2.8	0.69	7.3	2.4	0.67
0.35	0.14	0.33	0.14	0	0	0	0	0	0.69	0.7	25.5	26.8	0.69	0.7	11	3.2	0.65	11.9	3.8	0.65
0.23	0.16	0.29	0.18	0	2	1	1	1	0.77	0.71	29.9	29.3	0.76	0.72	15.5	5.3	0.66	9.2	2.4	0.74
0.3	0.13	0.34	0.14	0	1	1	0	0	0.72	0.73	28.2	28	0.71	0.7	11.7	4.1	0.64	7.5	2.2	0.71
0.27	0.11	0.3	0.13	0	1	1	1	1	0.75	0.7	28.7	29.1	0.74	0.71	16.3	4	0.75	13.4	4.5	0.66
0.3	0.16	0.36	0.18	0	1	1	0	0	0.74	0.67	28.6	25.8	0.74	0.74	21.9	4.6	0.79	10.2	2.8	0.73
0.23	0.14	0.26	0.18	0	2	1	1	1	0.79	0.77	29.8	27.6	0.76	0.75	12.2	3.6	0.71	9	2.6	0.69
0.23	0.15	0.28	0.18	0	0	0	0	0	0.7	0.7	30.1	27.6	0.71	0.73	12.3	4.7	0.62	11	4.2	0.71
0.25	0.21	0.31	0.12	0	2	1	1	1	0.76	0.72	29.1	27.7	0.74	0.72	18.9	6.3	0.67	10.2	4.2	0.59
0.31	0.15	0.33	0.18	0	0	0	0	0	0.76	0.75	28.5	26.5	0.67	0.7	9	2.3	0.7	9.7	1.9	0.8
0.2	0.14	0.21	0.14	0	3	1	2	1	0.81	0.82	31.7	29.7	0.78	0.77	15.2	5.3	0.65	12.9	3.6	0.72
0.5	0.14	0.42	0.13	0	0	0	0	0	0.6	0.63	23.8	23.1	0.59	0.63	22.7	9.7	0.52	12.7	4.9	0.62
0.23	0.14	0.24	0.15	0	2	1	2	1	0.73	0.77	31.1	29.1	0.77	0.77	5.5	1.5	0.72	5.2	2	0.62
0.34	0.16	0.36	0.18	0	0	0	0	0	0.7	0.71	26.6	25.9	0.7	0.65	12.7	2.6	0.79	10.5	2.8	0.67
0.31	0.18	0.33	0.16	0	0	0	0	0	0.69	0.73	27.1	26.5	0.71	0.64	12	4.9	0.69	11.9	4.3	0.68
0.32	0.2	0.31	0.18	0	0	0	0	0	0.7	0.71	27.4	27.6	0.61	0.62	7.7	3.3	0.57	8	2.7	0.66
0.41	0.16	0.42	0.17	0	0	0	0	0	0.66	0.65	25	24.1	0.6	0.6	14.2	4.2	0.7	11.1	3.1	0.72
0.41	0.18	0.42	0.17	0	0	0	0	0	0.65	0.65	25.6	25.1	0.66	0.67	15.2	4.3	0.6	14.1	3.5	0.64
0.32	0.17	0.41	0.18	0	0	0	0	0	0.72	0.7	25	23.2	0.7	0.69	13	5.1	0.61	10.6	2.5	0.76
0.28	0.13	0.27	0.12	0	1	1	1	1	0.74	0.74	27.6	27	0.79	0.77	16.5	6.3	0.62	8	2.5	0.69
0.35	0.17	0.38	0.18	0	0	0	0	0	0.7	0.71	25.6	24.2	0.71	0.7	12.9	4	0.69	10.3	4.2	0.59
#NULL!	#NULL!	#NULL!	#NULL!	1	0	0	0	0	#NULL!	#NULL!	#NULL!	#NULL!	#NULL!	#NULL!	#NULL!	#NULL!	#NULL!	#NULL!	#NULL!	#NULL!
#NULL!	#NULL!	#NULL!	#NULL!	1	0	0	1	1	#NULL!	#NULL!	#NULL!	#NULL!	#NULL!	#NULL!	#NULL!	#NULL!	#NULL!	#NULL!	#NULL!	#NULL!
#NULL!	#NULL!	#NULL!	#NULL!	1	0	0	0	0	#NULL!	#NULL!	#NULL!	#NULL!	#NULL!	#NULL!	#NULL!	#NULL!	#NULL!	#NULL!	#NULL!	#NULL!
#NULL!	#NULL!	#NULL!	#NULL!	1	0	0	1	1	#NULL!	#NULL!	#NULL!	#NULL!	#NULL!	#NULL!	#NULL!	#NULL!	#NULL!	#NULL!	#NULL!	#NULL!
#NULL!	#NULL!	#NULL!	#NULL!	1	1	1	0	0	#NULL!	#NULL!	#NULL!	#NULL!	#NULL!	#NULL!	#NULL!	#NULL!	#NULL!	#NULL!	#NULL!	#NULL!
#NULL!	#NULL!	#NULL!	#NULL!	1	2	1	2	1	#NULL!	#NULL!	#NULL!	#NULL!	#NULL!	#NULL!	#NULL!	#NULL!	#NULL!	#NULL!	#NULL!	#NULL!
#NULL!	#NULL!	#NULL!	#NULL!	1	0	0	0	0	#NULL!	#NULL!	#NULL!	#NULL!	#NULL!	#NULL!	#NULL!	#NULL!	#NULL!	#NULL!	#NULL!	#NULL!
#NULL!	#NULL!	#NULL!	#NULL!	1	0	0	0	0	#NULL!	#NULL!	#NULL!	#NULL!	#NULL!	#NULL!	#NULL!	#NULL!	#NULL!	#NULL!	#NULL!	#NULL!
#NULL!	#NULL!	#NULL!	#NULL!	1	0	0	0	0	#NULL!	#NULL!	#NULL!	#NULL!	#NULL!	#NULL!	#NULL!	#NULL!	#NULL!	#NULL!	#NULL!	#NULL!
#NULL!	#NULL!	#NULL!	#NULL!	1	0	0	0	0	#NULL!	#NULL!	#NULL!	#NULL!	#NULL!	#NULL!	#NULL!	#NULL!	#NULL!	#NULL!	#NULL!	#NULL!
#NULL!	#NULL!	#NULL!	#NULL!	1	0	0	0	0	#NULL!	#NULL!	#NULL!	#NULL!	#NULL!	#NULL!	#NULL!	#NULL!	#NULL!	#NULL!	#NULL!	#NULL!
#NULL!	#NULL!	#NULL!	#NULL!	1	1	1	1	1	#NULL!	#NULL!	#NULL!	#NULL!	#NULL!	#NULL!	#NULL!	#NULL!	#NULL!	#NULL!	#NULL!	#NULL!
#NULL!	#NULL!	#NULL!	#NULL!	1	0	0	0	0	#NULL!	#NULL!	#NULL!	#NULL!	#NULL!	#NULL!	#NULL!	#NULL!	#NULL!	#NULL!	#NULL!	#NULL!
#NULL!	#NULL!	#NULL!	#NULL!	1	0	0	1	1	#NULL!	#NULL!	#NULL!	#NULL!	#NULL!	#NULL!	#NULL!	#NULL!	#NULL!	#NULL!	#NULL!	#NULL!
#NULL!	#NULL!	#NULL!	#NULL!	1	0	0	0	0	#NULL!	#NULL!	#NULL!	#NULL!	#NULL!	#NULL!	#NULL!	#NULL!	#NULL!	#NULL!	#NULL!	#NULL!
#NULL!	#NULL!	#NULL!	#NULL!	1	1	1	1	1	#NULL!	#NULL!	#NULL!	#NULL!	#NULL!	#NULL!	#NULL!	#NULL!	#NULL!	#NULL!	#NULL!	#NULL!
#NULL!	#NULL!	#NULL!	#NULL!	1	0	0	0	0	#NULL!	#NULL!	#NULL!	#NULL!	#NULL!	#NULL!	#NULL!	#NULL!	#NULL!	#NULL!	#NULL!	#NULL!
#NULL!	#NULL!	#NULL!	#NULL!	1	0	0	0	0	#NULL!	#NULL!	#NULL!	#NULL!	#NULL!	#NULL!	#NULL!	#NULL!	#NULL!	#NULL!	#NULL!	#NULL!
#NULL!	#NULL!	#NULL!	#NULL!	1	0	0	0	0	#NULL!	#NULL!	#NULL!	#NULL!	#NULL!	#NULL!	#NULL!	#NULL!	#NULL!	#NULL!	#NULL!	#NULL!
#NULL!	#NULL!	#NULL!	#NULL!	1	2	1	2	1	#NULL!	#NULL!	#NULL!	#NULL!	#NULL!	#NULL!	#NULL!	#NULL!	#NULL!	#NULL!	#NULL!	#NULL!
#NULL!	#NULL!	#NULL!	#NULL!	1	0	0	0	0	#NULL!	#NULL!	#NULL!	#NULL!	#NULL!	#NULL!	#NULL!	#NULL!	#NULL!	#NULL!	#NULL!	#NULL!
#NULL!	#NULL!	#NULL!	#NULL!	1	0	0	1	1	#NULL!	#NULL!	#NULL!	#NULL!	#NULL!	#NULL!	#NULL!	#NULL!	#NULL!	#NULL!	#NULL!	#NULL!
#NULL!	#NULL!	#NULL!	#NULL!	1	0	0	0	0	#NULL!	#NULL!	#NULL!	#NULL!	#NULL!	#NULL!	#NULL!	#NULL!	#NULL!	#NULL!	#NULL!	#NULL!
#NULL!	#NULL!	#NULL!	#NULL!	1	0	0	0	0	#NULL!	#NULL!	#NULL!	#NULL!	#NULL!	#NULL!	#NULL!	#NULL!	#NULL!	#NULL!	#NULL!	#NULL!
#NULL!	#NULL!	#NULL!	#NULL!	1	0	0	0	0	#NULL!	#NULL!	#NULL!	#NULL!	#NULL!	#NULL!	#NULL!	#NULL!	#NULL!	#NULL!	#NULL!	#NULL!
#NULL!	#NULL!	#NULL!	#NULL!	1	0	0	0	0	#NULL!	#NULL!	#NULL!	#NULL!	#NULL!	#NULL!	#NULL!	#NULL!	#NULL!	#NULL!	#NULL!	#NULL!
#NULL!	#NULL!	#NULL!	#NULL!	1	0	0	0	0	#NULL!	#NULL!	#NULL!	#NULL!	#NULL!	#NULL!	#NULL!	#NULL!	#NULL!	#NULL!	#NULL!	#NULL!
#NULL!	#NULL!	#NULL!	#NULL!	1	0	0	0	0	#NULL!	#NULL!	#NULL!	#NULL!	#NULL!	#NULL!	#NULL!	#NULL!	#NULL!	#NULL!	#NULL!	#NULL!
#NULL!	#NULL!	#NULL!	#NULL!	1	0	0	1	1	#NULL!	#NULL!	#NULL!	#NULL!	#NULL!	#NULL!	#NULL!	#NULL!	#NULL!	#NULL!	#NULL!	#NULL!
#NULL!	#NULL!	#NULL!	#NULL!	1	0	0	0	0	#NULL!	#NULL!	#NULL!	#NULL!	#NULL!	#NULL!	#NULL!	#NULL!	#NULL!	#NULL!	#NULL!	#NULL!
